# Supplementary material for: On the limits of graph neural networks for the early diagnosis of Alzheimer’s disease
Source: PubMed Central journal article supplement (PMC9587223; doi:10.1038/s41598-022-21491-y), 2022-10-21
Supplement: 41598_2022_21491_MOESM1_ESM.pdf [file 41598_2022_21491_MOESM1_ESM.pdf]

# On the limits of graph neural networks for the early diagnosis of Alzheimer's Disease

Laura Hernández-Lorenzo<sup>1,2,3,\*</sup>, Markus Hoffmann<sup>3,4</sup>, Evelyn Scheibling<sup>3</sup>, Markus List<sup>3,†</sup>, Jordi A. Matías-Guiu<sup>2,†</sup>, Jose L. Ayala<sup>1,†</sup>, and for the Alzheimer's Disease Neuroimaging Initiative\*\*

<sup>1</sup>Department of Computer Architecture and Automation, Computer Science Faculty, Complutense University of Madrid, 28040 Madrid, Spain

<sup>2</sup>Department of Neurology, Hospital Clínico San Carlos, San Carlos Research Health Institute (IdISSC), Universidad Complutense, 28040 Madrid, Spain

<sup>3</sup>Big Data in BioMedicine Group, Chair of Experimental Bioinformatics, TUM School of Life Sciences, Technical University of Munich, Munich, Germany

<sup>4</sup>Institute for Advanced Study (Lichtenbergstrasse 2 a, D-85748 Garching, Germany), Technical University of Munich, Germany;

\* corresponding author: [laurahl@ucm.es](mailto:laurahl@ucm.es)

† The authors wish it to be known that, in their opinion, the last three authors should be regarded as Joint Senior Authors.

\*\* Data used in the preparation of this article were obtained from the Alzheimer's Disease Neuroimaging Initiative (ADNI) database ([adni.loni.usc.edu](http://adni.loni.usc.edu)). As such, the investigators within the ADNI contributed to the design and implementation of ADNI and/or provided data but did not participate in the analysis or writing of this report. A complete listing of ADNI investigators can be found at:

[https://adni.loni.usc.edu/wp-content/uploads/how\\_to\\_apply/ADNI\\_Acknowledgement\\_List.pdf](https://adni.loni.usc.edu/wp-content/uploads/how_to_apply/ADNI_Acknowledgement_List.pdf)

## Supplementary Information

### 1. Materials and Methods

#### 1.1. GraphGym description and use

As is the case in many deep learning tasks, one of the main problems is searching for the best hyperparameters and network architecture. Because the datasets built in this work were new, we employed the novel tool called GraphGym developed by <sup>12</sup> for searching for the best GNN architecture for each classification task. Using configuration and grid files, it is possible to launch a batch of experiments in a relatively short search time. Applying one GNN design or model to a specific task is defined as an experiment in this framework. Several design dimensions (hyperparameters that can be tuned, e.g., batch normalization) with different options (e.g., True) conform to the so-called design space. Three designs can be distinguished: intra-layer, inter-layer, and learning configuration, where "layer" refers to message passing layers. Intra-layer design corresponds to dimensions that could vary within the message passing layers. In this case, the only dimension that could vary was the aggregation function (Mean, Max, or Sum). Inter-layer design contains the dimensions that could change between the message passing layers. These dimensions include the number of message passing layers, the type of skip connection that exists between them (Skip-Sum or Skip-Concat), or the number of layers that could have the multilayer perceptrons (MLPs) before and after the message passing layers (pre-process and post-process MLP, respectively). Finally, the learning configuration design contains four basic dimensions for any neural network training: batch size, learning rate, optimizer, and the maximum number of training epochs. All dimensions here described, except

for the number of epochs and message passing layers, were set to the values or options found to be preferable for an ample task space using GNNs by <sup>12</sup>. Supplementary Table 1 shows the design space used for each classification task performed in this work.

**Supplementary Table 1.** Design space for each classification task in GraphGym

| Design                 | Dimension                                                                                         | Options                                           |
|------------------------|---------------------------------------------------------------------------------------------------|---------------------------------------------------|
| Intra-layer            | Batch normalization<br>Dropout<br>Activation function<br>Aggregation function                     | True<br>False<br>PReLU<br>Mean, Max, Sum          |
| Inter-layer            | Pre-process MLP layers<br>Layer-connectivity<br>Message-passing layers<br>Post-process MLP layers | 1, 2<br>Skip-Sum, Skip-Concat<br><b>2</b><br>2, 3 |
| Learning configuration | Batch size<br>Learning rate<br>Optimizer<br>Training epochs                                       | 32<br>0.01<br>Adam<br><b>200</b>                  |

Bolded values are configuration parameters changed from original work by You et al. (2020).

**Supplementary Table 2.** Grid of hyperparameters used for each canonical machine learning algorithm.

| Algorithm           | Hyperparameters      | Grid values                                                 |
|---------------------|----------------------|-------------------------------------------------------------|
| Logistic Regression | NA                   | NA                                                          |
| SVM Linear          | kernel<br>C          | 'linear'<br>0.01, 0.1, 1, 10, 100, 1000                     |
| SVM RBF             | kernel<br>C<br>gamma | 'rbf'<br>0.01, 0.1, 1, 10, 100, 1000<br>0.001, 0.01, 0.1, 1 |
| Random Forest       | n_estimators         | 50, 500, 5000                                               |

Note: All other values were left as default according to Scikit-Learn v.1.0.2 library<sup>31</sup>.

## 2. Results

**Supplementary Table 3.** GNN best configurations and their classification metrics obtained in ADNI dataset test set using different biological networks as input.

### (a) PET label results

| Network       | Best GNN configuration    | Accuracy        | Precision       | Recall          | F1-Score        | AUC-ROC         |
|---------------|---------------------------|-----------------|-----------------|-----------------|-----------------|-----------------|
| AD BioGRID    | 2, 2, 2, Skip-Cat, Max    | 0.6275 ± 0.0511 | 0.662 ± 0.0402  | 0.7260 ± 0.1274 | 0.6812 ± 0.0654 | 0.6648 ± 0.0656 |
| AD GIANT      | 1, 2, 3, Skip-Sum, Sum    | 0.6078 ± 0.0713 | 0.6823 ± 0.0796 | 0.6716 ± 0.1828 | 0.6340 ± 0.1102 | 0.6635 ± 0.0786 |
| AD HuRI       | 2, 2, 2, Skip-Concat, Sum | 0.6367 ± 0.0652 | 0.7019 ± 0.0614 | 0.6439 ± 0.1086 | 0.6628 ± 0.0693 | 0.6692 ± 0.0624 |
| AD PPT-Ohmnet | 2, 2, 2, Skip-Sum, Max    | 0.6362 ± 0.0748 | 0.6739 ± 0.1139 | 0.6488 ± 0.1169 | 0.6540 ± 0.1031 | 0.6801 ± 0.0643 |
| AD STRING     | 1, 2, 2, Skip-Concat, Sum | 0.6407 ± 0.0576 | 0.6642 ± 0.0492 | 0.7675 ± 0.0823 | 0.7035 ± 0.0507 | 0.6763 ± 0.0637 |

### (b) PET&DX label results

| Network       | Best GNN configuration     | Accuracy        | Precision       | Recall          | F1-Score        | AUC-ROC         |
|---------------|----------------------------|-----------------|-----------------|-----------------|-----------------|-----------------|
| AD BioGRID    | 1, 2, 2, Skip-Concat, Mean | 0.6827 ± 0.1097 | 0.6991 ± 0.1272 | 0.7249 ± 0.2027 | 0.6915 ± 0.1773 | 0.7526 ± 0.0819 |
| AD GIANT      | 2, 2, 2, Skip-Concat, Sum  | 0.6442 ± 0.0705 | 0.7022 ± 0.1116 | 0.6588 ± 0.1781 | 0.6561 ± 0.1334 | 0.7035 ± 0.0634 |
| AD HuRI       | 1, 2, 3, Skip-Sum, Sum     | 0.6824 ± 0.0628 | 0.7228 ± 0.0641 | 0.7502 ± 0.103  | 0.7291 ± 0.0553 | 0.7397 ± 0.0682 |
| AD PPT-Ohmnet | 2, 2, 2, Skip-Concat, Max  | 0.6992 ± 0.0683 | 0.7381 ± 0.0688 | 0.7552 ± 0.1105 | 0.7408 ± 0.0611 | 0.7521 ± 0.0589 |
| AD STRING     | 1, 2, 2, Skip-Sum, Max     | 0.6678 ± 0.0448 | 0.7036 ± 0.0774 | 0.7894 ± 0.1497 | 0.7266 ± 0.0469 | 0.7502 ± 0.0563 |

GNN configuration is presented as pre-MLP layers, message-passing layers, post-MLP layers, layer connectivity, and aggregation function. All performance values are presented as the mean of the classification metric ± standard deviation.

**Supplementary Table 4.** GNN and non-GNN models classification metrics obtained in the ADNI cohort test set using different datasets as input: only using APOE, several genes in AD PPT-Ohmnet network, and those same genes without including APOE gene.

**(a) PET label results**

| Dataset               | Model               | Accuracy        | Precision       | Recall          | F1-Score        | AUC                    |
|-----------------------|---------------------|-----------------|-----------------|-----------------|-----------------|------------------------|
| Only APOE             | Baseline model      | 0.5992 ± 0.0399 | 0.6345 ± 0.0686 | 0.7659 ± 0.2127 | 0.6725 ± 0.0719 | 0.6406 ± 0.0691        |
|                       | Logistic Regression | 0.599 ± 0.0534  | 0.6331 ± 0.0515 | 0.722 ± 0.156   | 0.6644 ± 0.066  | 0.6229 ± 0.0693        |
|                       | SVM Linear          | 0.6074 ± 0.0553 | 0.6549 ± 0.0646 | 0.7 ± 0.1879    | 0.6604 ± 0.0688 | 0.627 ± 0.0493         |
| AD PPT-Ohmnet         | SVM RBF             | 0.6006 ± 0.061  | 0.6206 ± 0.079  | 0.8683 ± 0.1858 | 0.7062 ± 0.0506 | 0.6275 ± 0.0628        |
|                       | Random Forest       | 0.6197 ± 0.0622 | 0.6799 ± 0.0612 | 0.6244 ± 0.1017 | 0.647 ± 0.0673  | 0.6291 ± 0.0771        |
|                       | GNN GraphGym        | 0.6362 ± 0.0748 | 0.6739 ± 0.1139 | 0.6488 ± 0.1169 | 0.654 ± 0.1031  | <b>0.6801 ± 0.0643</b> |
| AD PPT-Ohmnet no APOE | Logistic Regression | 0.5538 ± 0.0176 | 0.5598 ± 0.0095 | 0.9805 ± 0.0277 | 0.7127 ± 0.0147 | 0.481 ± 0.067          |
|                       | SVM Linear          | 0.5607 ± 0.016  | 0.5631 ± 0.0087 | 0.9902 ± 0.0236 | 0.7179 ± 0.0129 | 0.4942 ± 0.0459        |
|                       | SVM RBF             | 0.5593 ± 0.0151 | 0.5625 ± 0.0086 | 0.9878 ± 0.0237 | 0.7168 ± 0.0124 | 0.5192 ± 0.0726        |
|                       | Random Forest       | 0.5524 ± 0.027  | 0.5602 ± 0.0144 | 0.9634 ± 0.035  | 0.7084 ± 0.0202 | 0.4853 ± 0.0771        |
|                       | GNN GraphGym        | 0.5372 ± 0.0321 | 0.5314 ± 0.1073 | 0.7821 ± 0.2263 | 0.586 ± 0.1563  | <b>0.5454 ± 0.0513</b> |

**(b) PET&DX label results**

| Dataset               | Model               | Accuracy        | Precision       | Recall          | F1-Score        | AUC                    |
|-----------------------|---------------------|-----------------|-----------------|-----------------|-----------------|------------------------|
| Only APOE             | Baseline model      | 0.7066 ± 0.0682 | 0.7556 ± 0.0714 | 0.7368 ± 0.1018 | 0.7412 ± 0.0615 | 0.6901 ± 0.0979        |
|                       | Logistic Regression | 0.6627 ± 0.0798 | 0.6977 ± 0.0777 | 0.7424 ± 0.109  | 0.715 ± 0.0707  | 0.6825 ± 0.076         |
|                       | SVM Linear          | 0.6531 ± 0.0541 | 0.6987 ± 0.0651 | 0.7319 ± 0.1307 | 0.7053 ± 0.0463 | 0.6872 ± 0.0654        |
| AD PPT-Ohmnet         | SVM RBF             | 0.669 ± 0.0637  | 0.7172 ± 0.0779 | 0.7371 ± 0.1248 | 0.7174 ± 0.0491 | 0.7025 ± 0.0638        |
|                       | Random Forest       | 0.6906 ± 0.0579 | 0.7414 ± 0.0473 | 0.7149 ± 0.1135 | 0.7231 ± 0.0638 | 0.6901 ± 0.075         |
|                       | GNN GraphGym        | 0.6992 ± 0.0683 | 0.7381 ± 0.0688 | 0.7552 ± 0.1105 | 0.7408 ± 0.0611 | <b>0.7521 ± 0.0589</b> |
| AD PPT-Ohmnet no APOE | Logistic Regression | 0.568 ± 0.0294  | 0.5737 ± 0.0192 | 0.9617 ± 0.0455 | 0.7184 ± 0.0247 | 0.4425 ± 0.0725        |
|                       | SVM Linear          | 0.5586 ± 0.0204 | 0.5701 ± 0.0158 | 0.9398 ± 0.0607 | 0.7090 ± 0.0224 | 0.4687 ± 0.0918        |
|                       | SVM RBF             | 0.5711 ± 0.0188 | 0.5758 ± 0.0145 | 0.9617 ± 0.0587 | 0.7197 ± 0.0205 | <b>0.5571 ± 0.0481</b> |
|                       | Random Forest       | 0.5679 ± 0.0307 | 0.5760 ± 0.0190 | 0.9339 ± 0.0684 | 0.7119 ± 0.0309 | 0.5122 ± 0.0916        |
|                       | GNN GraphGym        | 0.5502 ± 0.033  | 0.5741 ± 0.0413 | 0.8139 ± 0.1811 | 0.6416 ± 0.0979 | 0.5554 ± 0.0485        |

**Supplementary Table 5.** 1-sample t-test p-values obtained comparing each model's performance against the baseline model performance (Logistic Regression with only APOE as input) and against a random value performance (AUC 0.5).

| Label  | Dataset                  | Model               | Against baseline | Against GNN         | Against random      | Against no APOE     |
|--------|--------------------------|---------------------|------------------|---------------------|---------------------|---------------------|
| PET    | AD PPT-Ohmnet            | Logistic Regression | 7.1252e-01       | <b>3.5778e-02 *</b> | 9.9983e-01          | <b>9.8484e-05 *</b> |
|        |                          | SVM Linear          | 6.8956e-01       | <b>2.6525e-02 *</b> | 9.9999e-01          | <b>3.5104e-06 *</b> |
|        |                          | SVM RBF             | 6.6811e-01       | <b>4.0317e-02 *</b> | 9.9994e-01          | <b>1.0920e-03 *</b> |
|        |                          | Random Forest       | 6.3489e-01       | 6.2651e-02          | 9.9975e-01          | <b>2.8652e-04 *</b> |
|        |                          | GNN GraphGym        | 1.0072e-01       | -                   | 1.0000e+00          | <b>3.1765e-05 *</b> |
|        | AD PPT-Ohmnet<br>no APOE | Logistic Regression | 9.9997e-01       | <b>1.3357e-02 *</b> | 1.9665e-01          | -                   |
|        |                          | SVM Linear          | 9.9999e-01       | <b>1.5148e-02 *</b> | 3.4927e-01          | -                   |
|        |                          | SVM RBF             | 9.9939e-01       | 1.8130e-01          | 7.8729e-01          | -                   |
|        |                          | Random Forest       | 9.9992e-01       | <b>2.7457e-02 *</b> | 2.8052e-01          | -                   |
|        |                          | GNN GraphGym        | 9.9871e-01       | -                   | 9.8960e-01          | -                   |
| PET&DX | AD PPT-Ohmnet            | Logistic Regression | 5.7567e-01       | <b>1.7280e-02 *</b> | 9.9998e-01          | <b>5.0849e-07 *</b> |
|        |                          | SVM Linear          | 5.2998e-01       | <b>1.5860e-02 *</b> | 1.0000e+00          | <b>4.2853e-06 *</b> |
|        |                          | SVM RBF             | 3.7087e-01       | <b>4.3754e-02 *</b> | 1.0000e+00          | <b>9.3743e-06 *</b> |
|        |                          | Random Forest       | 4.9994e-01       | <b>2.7398e-02 *</b> | 9.9999e-01          | <b>7.9737e-05 *</b> |
|        |                          | GNN GraphGym        | 5.1717e-02       | -                   | 1.0000e+00          | <b>9.4311e-08 *</b> |
|        | AD PPT-Ohmnet<br>no APOE | Logistic Regression | 1.0000e+00       | <b>3.4273e-04 *</b> | <b>1.6727e-02 *</b> | -                   |
|        |                          | SVM Linear          | 9.9997e-01       | <b>8.2945e-03 *</b> | 1.5417e-01          | -                   |
|        |                          | SVM RBF             | 9.9942e-01       | 5.3144e-01          | 9.9773e-01          | -                   |
|        |                          | Random Forest       | 9.9973e-01       | 1.0200e-01          | 6.5781e-01          | -                   |
|        |                          | GNN GraphGym        | 9.9947e-01       | -                   | 9.9717e-01          | -                   |

Against baseline, H1: mean other model is greater than mean baseline

Against GNN, H1: mean other non-GNN model is lower than mean GNN model

Against random, H1: mean model is greater than a random AUC value

Against no APOE, H1 mean no APOE model is lower than mean APOE model

\*p-values < 0.05

**Supplementary Table 6.** 1-sample t-test p-values adjusted by Benjamini-Hochberg method <sup>33</sup> obtained by comparing original graph datasets' performance vs. random graph datasets' performance on the test set using PET and PET&DX labels on each of their corresponding folds.

| Label - Fold number | p-value "Shuffled" | p-value "Rewired" |
|---------------------|--------------------|-------------------|
| PET - Fold 1        | 2.6017e-23 *       | 3.7085e-24 *      |
| PET - Fold 2        | 4.5905e-10 *       | 1.4036e-12 *      |
| PET - Fold 3        | 4.5723e-32 *       | 7.3250e-33 *      |
| PET - Fold 4        | 5.1310e-09 *       | 4.8923e-10 *      |
| PET - Fold 5        | 1.6292e-16 *       | 2.0698e-18 *      |
| PET - Fold 6        | 3.7464e-03 *       | 1.3709e-04 *      |
| PET - Fold 7        | 1.5944e-26 *       | 2.1551e-25 *      |
| PET - Fold 8        | 9.6640e-01         | 9.8883e-01        |
| PET - Fold 9        | 1.6147e-01         | 6.9903e-02        |
| PET - Fold 10       | 1.6726e-21 *       | 1.6305e-22 *      |
| PET&DX - Fold 1     | 2.1960e-33 *       | 1.9714e-34 *      |
| PET&DX - Fold 2     | 2.6590e-54 *       | 3.0006e-57 *      |
| PET&DX - Fold 3     | 1.3214e-07 *       | 5.5099e-06 *      |
| PET&DX - Fold 4     | 6.1280e-37 *       | 2.0128e-36 *      |
| PET&DX - Fold 5     | 1.5999e-23 *       | 1.0105e-22 *      |
| PET&DX - Fold 6     | 5.5533e-11 *       | 9.8836e-12 *      |
| PET&DX - Fold 7     | 8.9045e-06 *       | 3.9243e-02 *      |
| PET&DX - Fold 8     | 1.0000e+00         | 1.0000e+00        |
| PET&DX - Fold 9     | 4.1115e-43 *       | 2.2059e-41 *      |
| PET&DX - Fold 10    | 9.0603e-31 *       | 1.2288e-29 *      |

\*p-values < 0.05.

**Supplementary Table 7.** GNN best configuration and their performance results obtained in LOAD dataset test set using graph datasets obtained with AD PPT-Ohmnet PPI network.

| Network       | Best GNN configuration    | Accuracy        | Precision       | Recall          | F1-Score        | AUC-ROC                |
|---------------|---------------------------|-----------------|-----------------|-----------------|-----------------|------------------------|
| AD PPT-Ohmnet | 2, 2, 3, Skip-Concat, Sum | 0.6523 ± 0.0486 | 0.6917 ± 0.1004 | 0.7781 ± 0.0928 | 0.7236 ± 0.0797 | <b>0.6733 ± 0.0409</b> |

GNN configuration is presented as pre-MLP layers, message-passing layers, post-MLP layers, layer connectivity, and aggregation function. All performance values are presented as the mean of the classification metric ± standard deviation.

**Supplementary Table 8.** GNN and non-GNN models classification metrics obtained in the LOAD cohort test set using different datasets as input: only using APOE, several genes in AD PPT-Ohmnet network, and those same genes without including APOE gene.

| Dataset       | Model               | Accuracy        | Precision       | Recall          | F1-Score        | AUC                    |
|---------------|---------------------|-----------------|-----------------|-----------------|-----------------|------------------------|
| Only APOE     | Baseline model      | 0.6648 ± 0.0397 | 0.7662 ± 0.0341 | 0.6784 ± 0.0466 | 0.7191 ± 0.0373 | 0.6591 ± 0.0451        |
| AD PPT-Ohmnet | Logistic Regression | 0.6542 ± 0.0335 | 0.7353 ± 0.0261 | 0.7109 ± 0.0491 | 0.7222 ± 0.032  | 0.6541 ± 0.0505        |
|               | SVM Linear          | 0.6535 ± 0.04   | 0.6962 ± 0.035  | 0.8135 ± 0.0915 | 0.7472 ± 0.0373 | 0.6482 ± 0.0465        |
|               | SVM RBF             | 0.6485 ± 0.028  | 0.6747 ± 0.066  | 0.9131 ± 0.1413 | 0.7649 ± 0.0243 | 0.659 ± 0.0564         |
|               | Random Forest       | 0.6604 ± 0.0405 | 0.713 ± 0.0267  | 0.778 ± 0.0623  | 0.7431 ± 0.0373 | 0.6539 ± 0.0464        |
|               | GNN GraphGym        | 0.6523 ± 0.0486 | 0.6917 ± 0.1004 | 0.7781 ± 0.0928 | 0.7236 ± 0.0797 | <b>0.6733 ± 0.0409</b> |

**Supplementary Table 9.** 1-sample t-test p-values obtained comparing each model's performance against the baseline model performance (Logistic Regression with only APOE as input) and against a random value performance (AUC 0.5).

| Label | Dataset       | Model               | Against baseline | Against random      |
|-------|---------------|---------------------|------------------|---------------------|
| LOAD  | AD PPT-Ohmnet | Logistic Regression | 5.9103e-01       | <b>7.6678e-09 *</b> |
|       |               | SVM Linear          | 6.9812e-01       | <b>3.8991e-09 *</b> |
|       |               | SVM RBF             | 5.0101e-01       | <b>2.5141e-08 *</b> |
|       |               | Random Forest       | 5.9751e-01       | <b>2.0959e-09 *</b> |
|       |               | GNN GraphGym        | 2.3507e-01       | <b>4.2666e-11 *</b> |

\*p-values < 0.05
